# Supplementary material for: Antibacterial and Antispore Activities of Isolated Compounds from Piper cubeba L
Source: PubMed Central journal article supplement (PMC6749514; doi:10.3390/molecules24173095), 2019-08-26
Supplement: molecules-24-03095-s001.pdf [file molecules-24-03095-s001.pdf]

SUPPLEMENTARY MATERIALS

**Table S1.** Comparison of  $^1\text{H-NMR}$  (500 MHz,  $\text{CDCl}_3$ ) and  $^{13}\text{C-NMR}$  (125 MHz,  $\text{CDCl}_3$ ) of compound (1) with literature values.

| Position | $\delta\text{H}$                             | $\delta\text{C}$ | HMBC $^2J$ | HMBC $^3J$    | $\delta\text{H}^a$ (500 MHz, $\text{CDCl}_3$ )                | $\delta\text{C}^*$ (125 MHz $\text{CDCl}_3$ ) |
|----------|----------------------------------------------|------------------|------------|---------------|---------------------------------------------------------------|-----------------------------------------------|
| 1        | -                                            | 143.3            |            |               |                                                               | 142.3                                         |
| 2        | -                                            | 148.7            |            |               |                                                               | 148.5                                         |
| 3        | 6.49 (1H, s, H-3)                            | 97.8             | C-2, C-4   | C-1, C-5      | 6.49 (1H, dq, $J = 11.4\text{Hz}$ and $1.83\text{Hz}$ , H-1') | 97.4                                          |
| 4        | -                                            | 150.6            |            |               | -                                                             | 151.5                                         |
| 5        | -                                            | 118.9            |            |               | -                                                             | 118.0                                         |
| 6        | 6.94 (1H, s, H-6)                            | 114.6            | C-1, C-5   | C-7, C-2, C-4 | 6.84 (1H, s, H-6)                                             | 114.1                                         |
| 7        | 6.66 (1H, s, H-7)                            | 125.0            |            |               | 6.53 (1H, s, H-3)                                             | 125.8                                         |
| 8        | 6.13 (1H, m, H-8)                            | 124.4            | C-7        | C-5           | 5.76 (1H, dq, $J = 12.0\text{Hz}$ and $6.8\text{Hz}$ , H-2')  | 124.7                                         |
| 9        | 1.89 (3H, dd, $J = 8.0, 8.5\text{Hz}$ , H-9) | 18.8             | C-8        |               | 1.84 (3H, dd, $J = 7.3\text{Hz}$ and $1.8\text{Hz}$ ,         | 18.6                                          |
| 10       | 3.86 (3H, s, H-10)                           | 56.4             | C-1        |               | 3.83 (3H, s, $\text{OCH}_3$ )                                 | 56.4                                          |
| 11       | 3.88 (3H, s, H-11)                           | 56.1             | C-2        |               | 3.89 (3H, s, $\text{OCH}_3$ )                                 | 56.0                                          |
| 12       | 3.82 (3H, s, H-12)                           | 56.7             | C-4        |               | 3.81 (3H, s, $\text{OCH}_3$ )                                 | 56.6                                          |

<sup>a</sup>McGaw *et al.* (2002) & Dung *et al.* (2007)

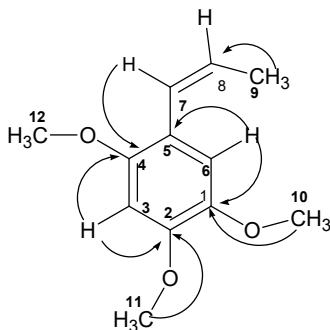

**Figure S1.** Structure and selected HMBC correlation of  $\beta$ -asarone isolated from *P. cubeba* L.

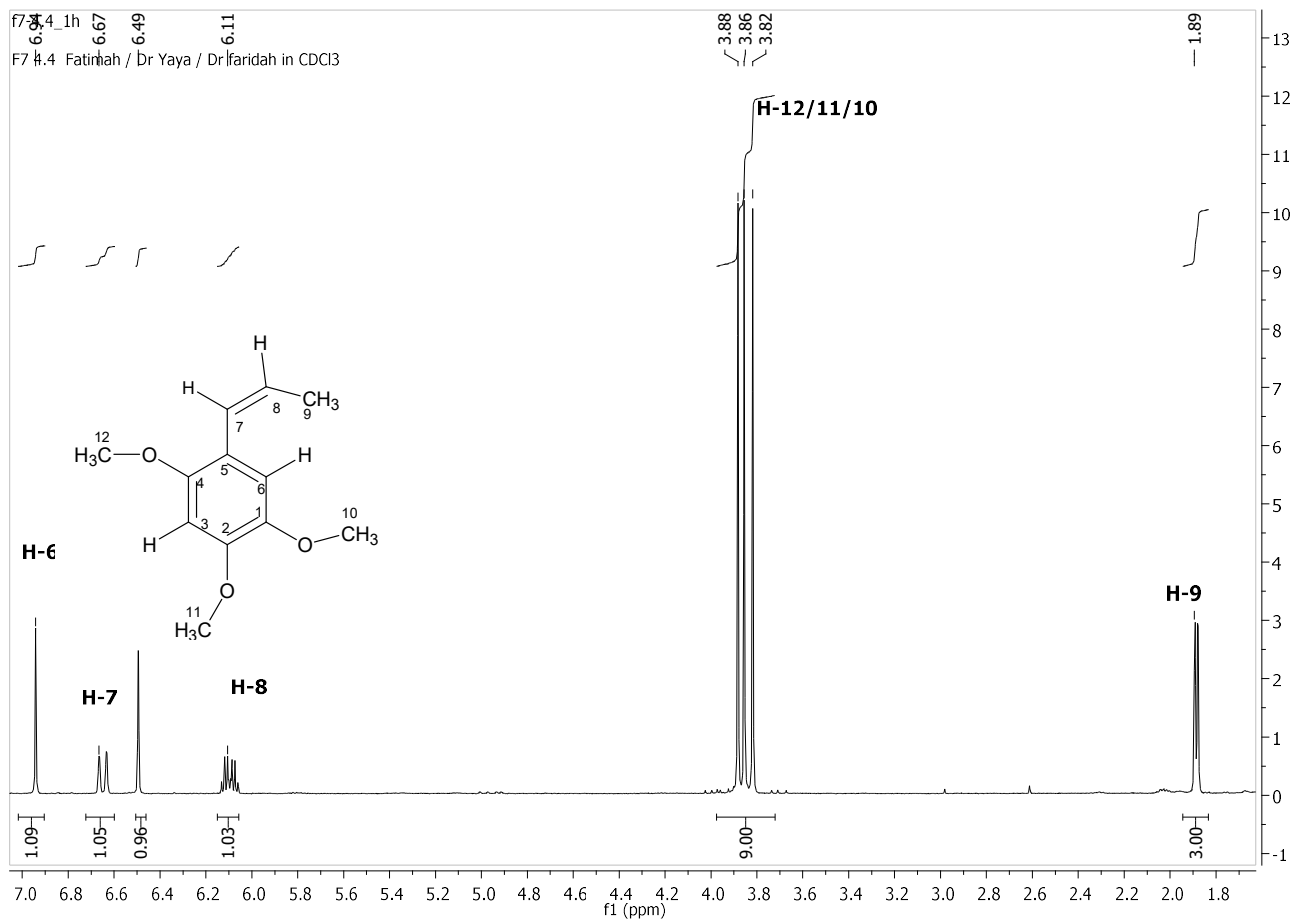

Figure S2.  $^1\text{H-NMR}$  spectrum of  $\beta$ -asarone (500 MHz,  $\text{CDCl}_3$ ).

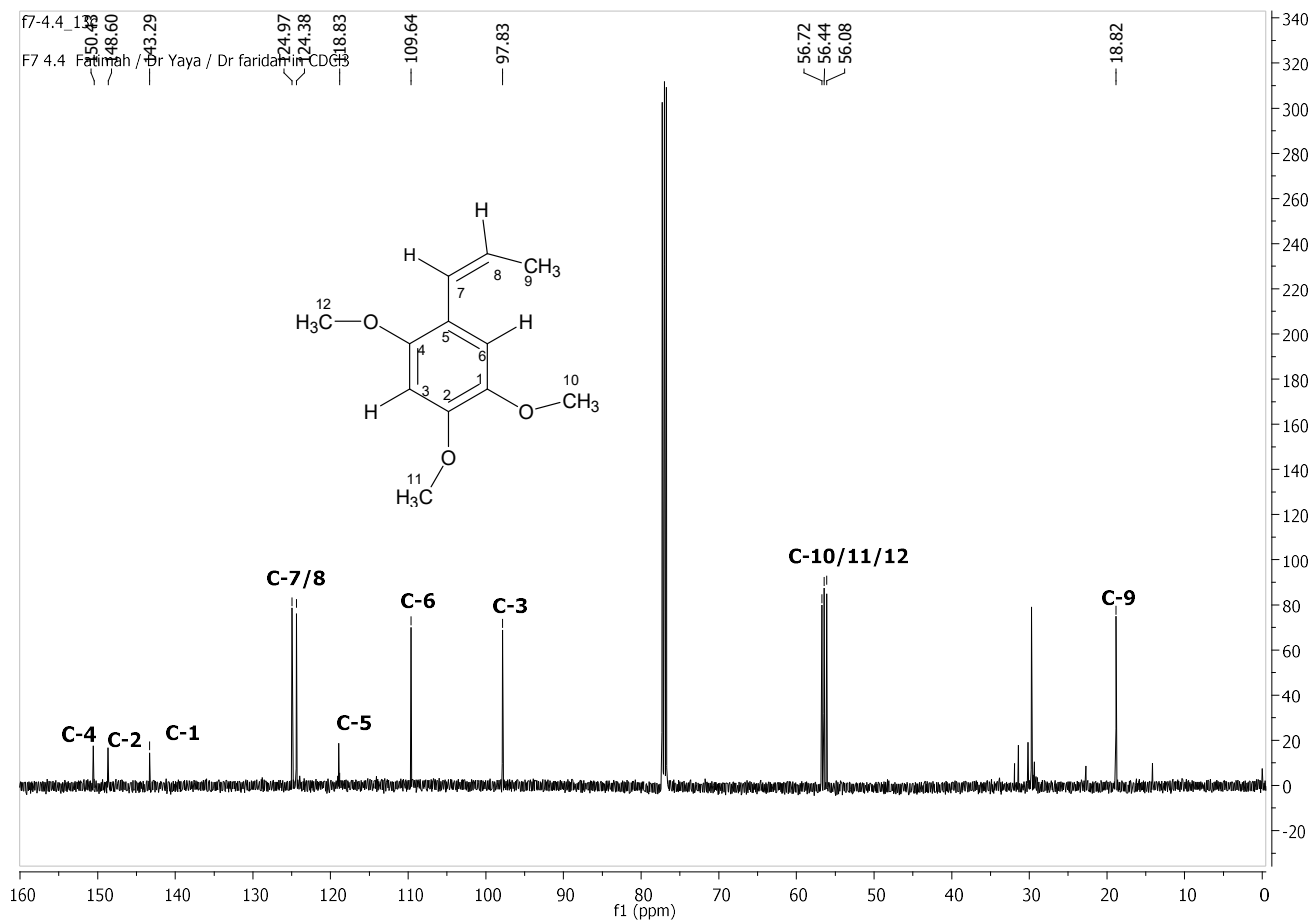

Figure S3. <sup>13</sup>C-NMR spectrum of β-asarone (125 MHz, CDCl<sub>3</sub>).

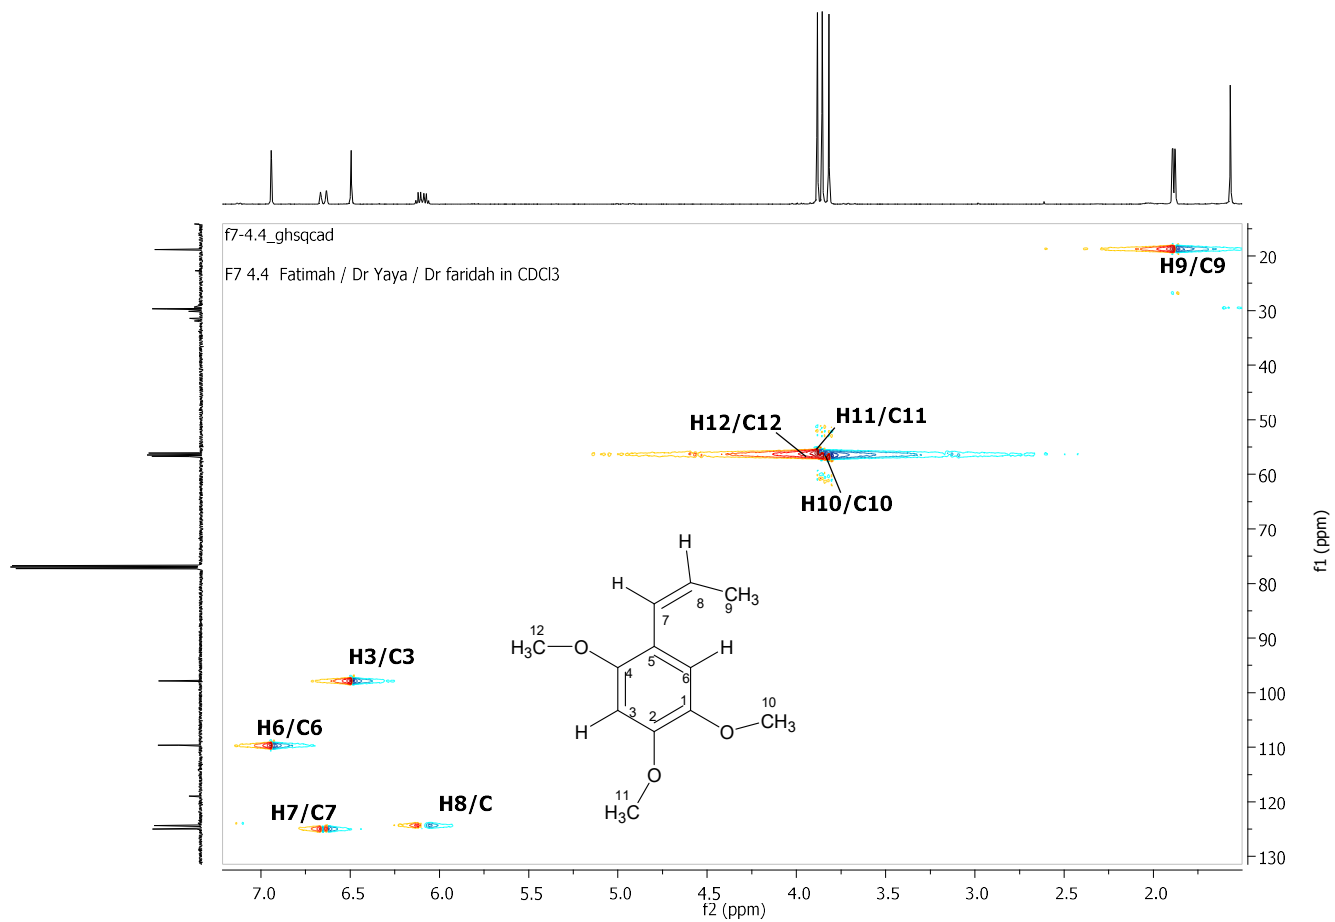

**Figure S4.** Selected HSQC correlation spectrum of β-asarone.

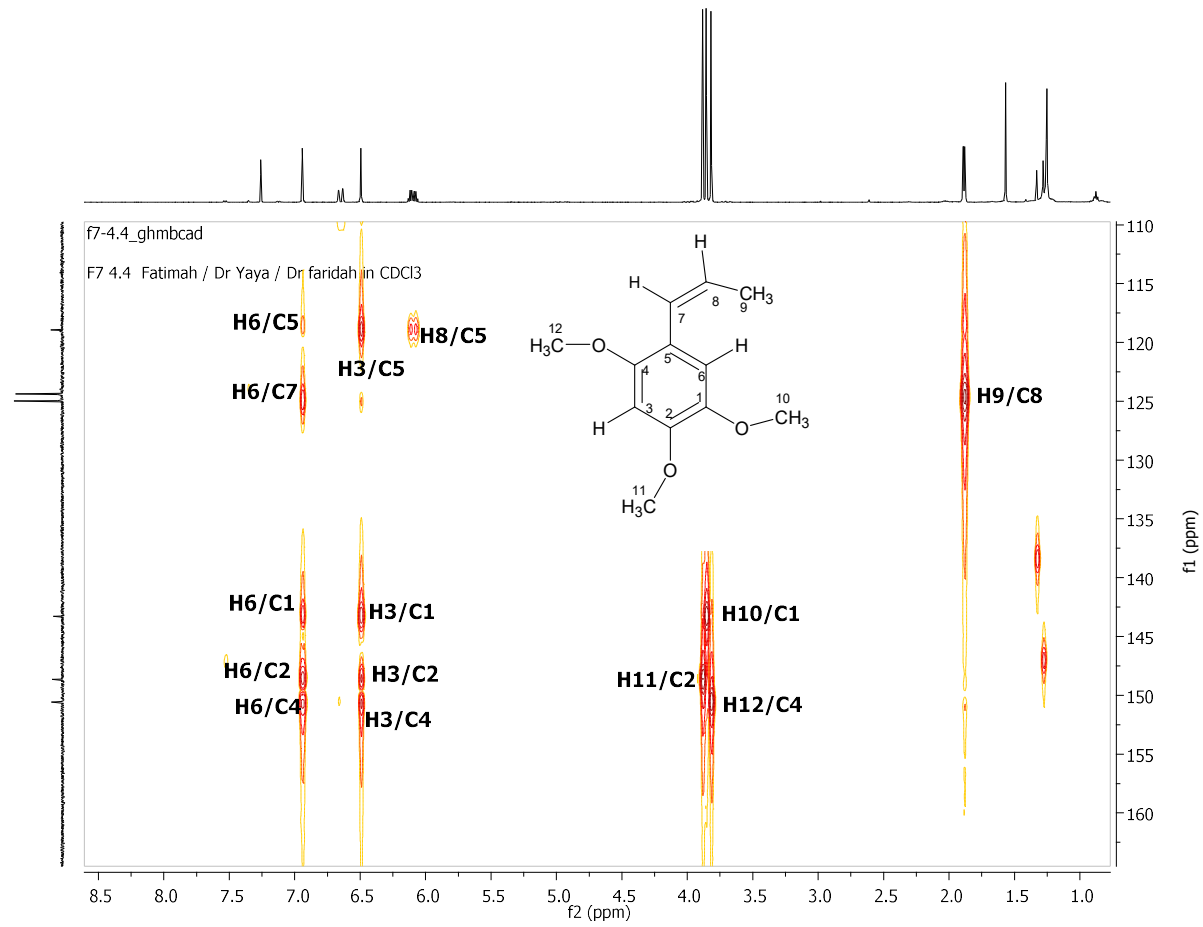

Figure S5. Selected HMBC correlation spectrum of  $\beta$ -asarone.

**Table S2.** Comparison of  $^1\text{H}$ -NMR (500 MHz,  $\text{CDCl}_3$ ) and  $^{13}\text{C}$ -NMR (125 MHz,  $\text{CDCl}_3$ ) of compound (2) with literature values.

| Position | $\delta\text{H}$   | $\delta\text{C}$ | HMBC $^2J$ | HMBC $^3J$ | $^1\text{H}^*$ 500 MHz | $^{13}\text{C}^*$ 125 MHz |
|----------|--------------------|------------------|------------|------------|------------------------|---------------------------|
| 1        | -                  | 117.5            |            |            | -                      | 117.3                     |
| 2        | -                  | 143.5            |            |            | -                      | 143.6                     |
| 3        | 6.49 (1H, s, H-3)  | 96.1             | C-2, C-4   |            | 6.50 (1H, s, H-3)      | 96.0                      |
| 4        | -                  | 158.9            |            |            | -                      | 158.6                     |
| 5        | -                  | 156.8            |            |            | -                      | 155.7                     |
| 6        | 7.33 (1H, s, H-6)  | 109.2            | C-1, C-5   | C-7        | 7.33(1H, s, H-6)       | 109.0                     |
| 7        | 10.32 (1H, s, H-7) | 188.3            | C-1        |            | 10.32(1H, s, H-7)      | 187.9                     |
| 8        | 3.97 (3H, s, H-8)  | 56.46            | C-5        |            | 3.97 (3H, s, H-8)      | 56.1                      |
| 9        | 3.92 (3H, s, H-9)  | 56.49            |            |            | 3.93 (3H, s, H-9)      | 56.2                      |
| 10       | 3.88 (3H, s, H-10) | 56.56            | C-2        |            | 3.88 (3H, s, H-10)     | 56.2                      |

\*Dung *et al.* (2007)

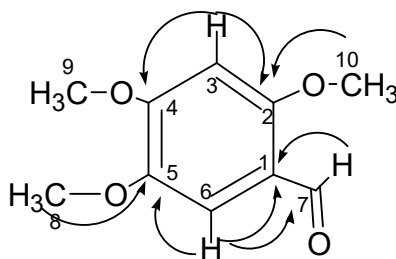

**Figure S6.** Structure and selected HMBC correlation of asaronaldehyde isolated from *P. cubeba* L.

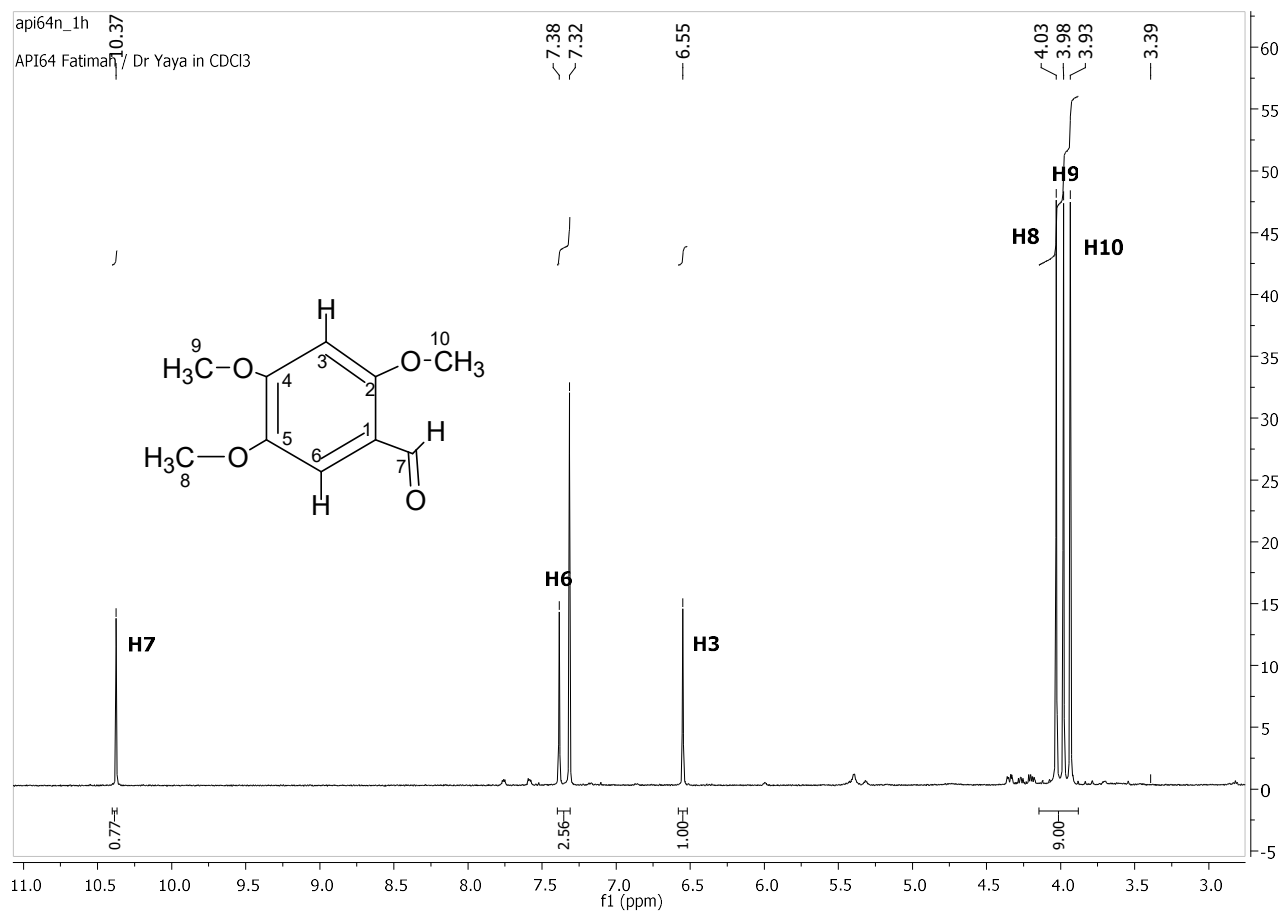

Figure S7.  $^1\text{H}$ -NMR spectrum of asaronaldehyde (125 MHz,  $\text{CDCl}_3$ ).

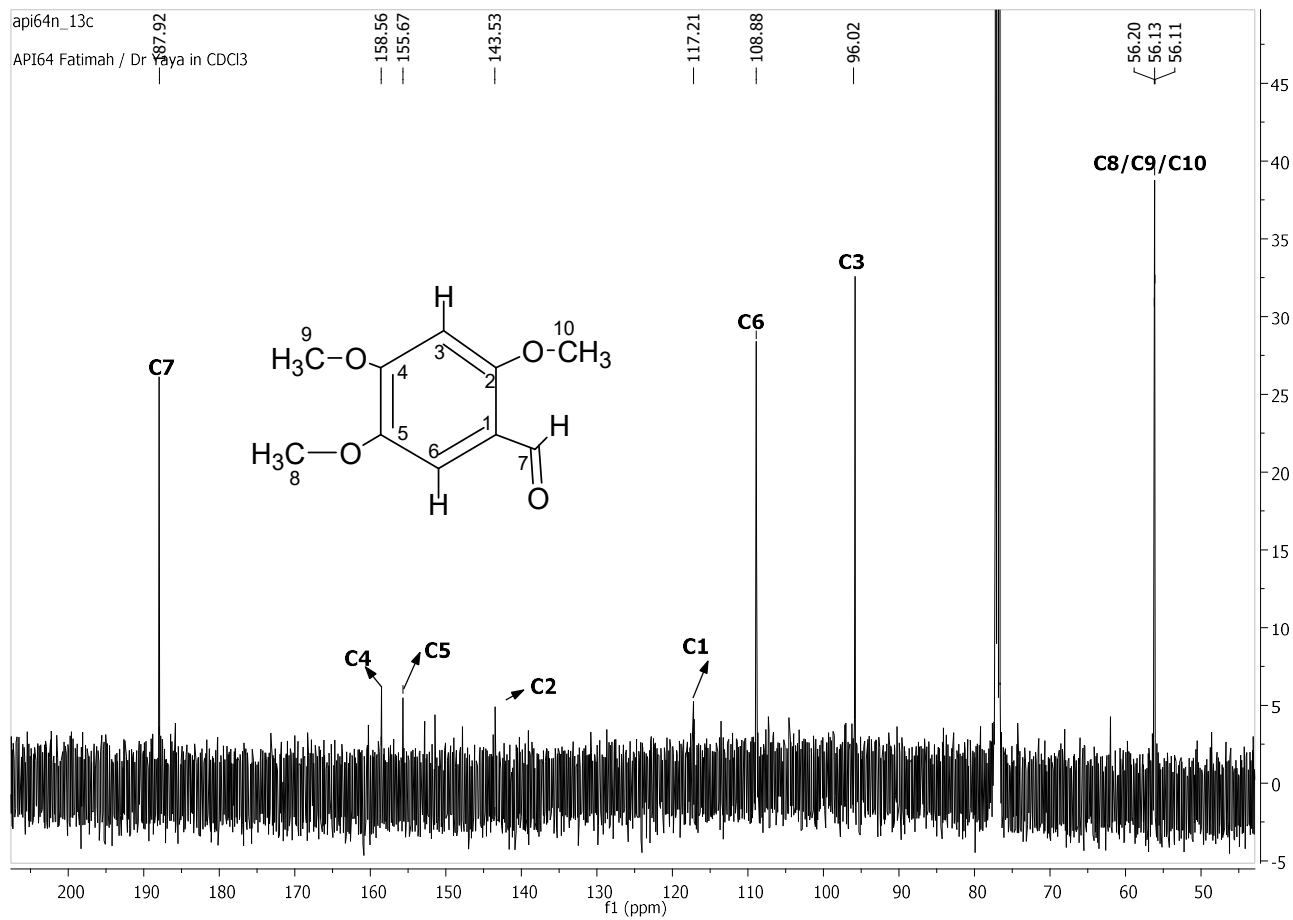

Figure S8.  $^{13}\text{C}$ -NMR spectrum of asaronaldehyde (125 MHz,  $\text{CDCl}_3$ ).



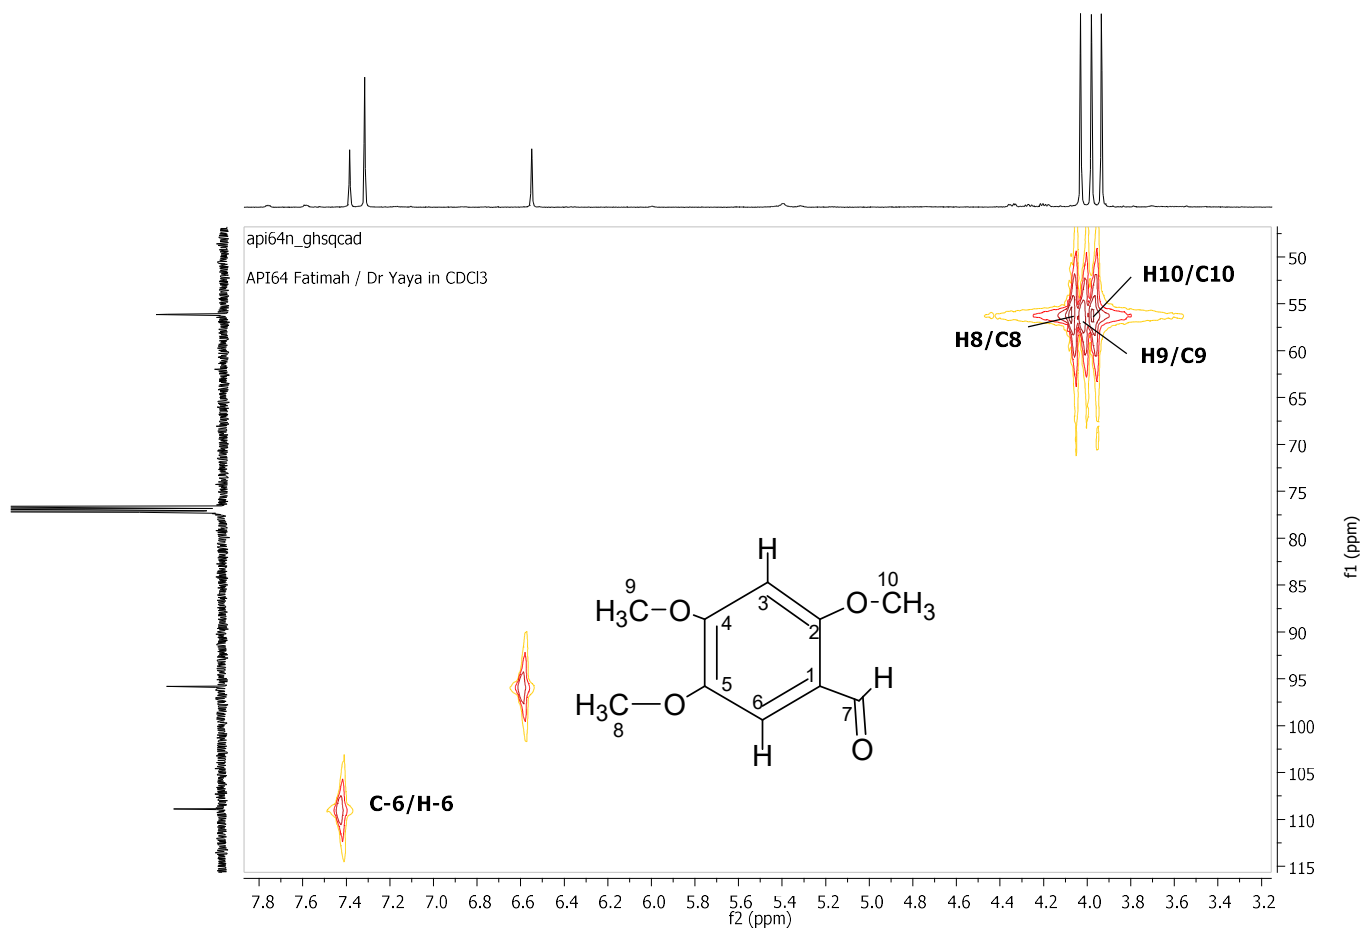

**Figure S9.** Selected HSQC correlation spectrum of asaronaldehyde.

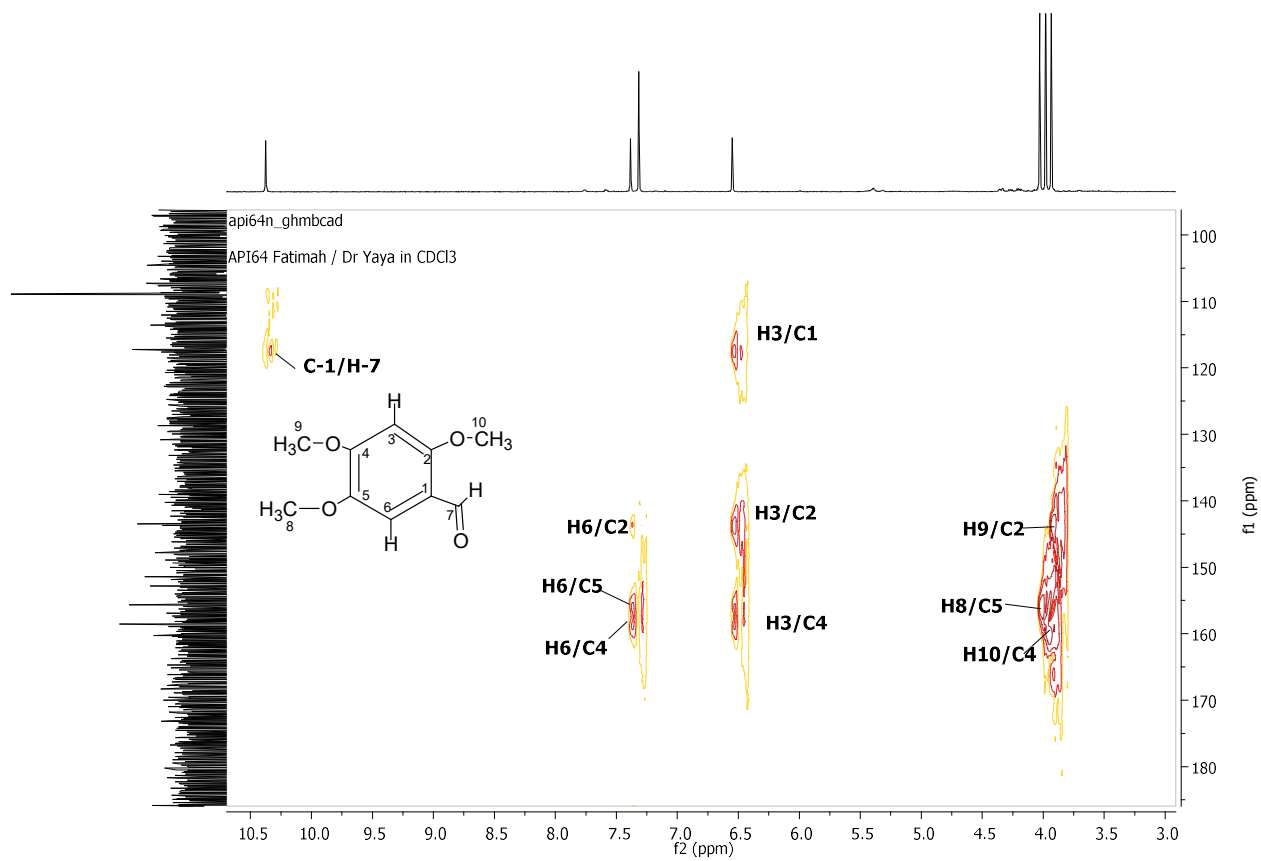

Figure S10. Selected HMBC correlation spectrum of asaronaldehyde.
